# Supplementary material for: Synergetic effect in heterogeneous acid catalysis by a porous ionic crystal based on Al(iii)–salphen and polyoxometalate
Source: Royal Society of Chemistry journal article supplement (doi:10.1039/c6dt04552a), 2017-01-01
Supplement: c6dt04552a1.pdf [file c6dt04552a1.pdf]

*Supporting Information for*

Synergetic Effect in Heterogeneous Acid Catalysis by a Porous Ionic Crystal Based on Al(III)-Salphen and Polyoxometalate

Ryosuke Kawahara, Ryota Osuga, Junko N. Kondo, Noritaka Mizuno, and Sayaka Uchida

Experimental details

Materials: Distilled water, methanol, ethanol, *p*-xylene, acetone, ammonium hydroxide solution, *o*-phenylenediamine, aluminum(III) nitrate nonahydrate, 2,6-lutidine, pinacol, and naphthalene were purchased from Kanto Chemicals. Salicylaldehyde was purchased from TCI. Solvents were dried over molecular sieves.  $[\text{Al}(\text{salphen})(\text{H}_2\text{O})_2](\text{NO}_3)^{\text{S1}}$  and  $\text{Na}_3[\alpha\text{-PW}_{12}\text{O}_{40}] \cdot n\text{H}_2\text{O}^{\text{S2}}$  were synthesized according to the reported procedure.

Characterizations: Inductively coupled plasma optical emission spectrometry (ICP-OES) (Agilent Technologies, ICP-OES720) was used for the quantitative analysis of inorganic elements in **I**. Prior to the ICP-OES measurements, ammonium hydroxide solution (1 mL) was added to ca. 10 mg of **I** to dissolve the solid completely into water (100 mL). CHN analysis was performed on Elementar vario MICRO cube at the Elemental Analysis Center of School of Science of the University of Tokyo. FT-IR spectra were measured with a JASCO FT/IR 4100 spectrometer (JASCO) equipped with a TGS (Figure S1) or a MCT (Figure S7) detector. The sample was mounted on a  $\text{CaF}_2$  plate (20 mm diameter) and placed in the center of an IR cell in Ar atmosphere. After measuring a background spectrum of the sample, pyridine was dropped on the sample in Ar atmosphere to measure an IR spectrum of pyridine-adsorbed sample. Thermogravimetry was conducted with a Thermo Plus 2 thermogravimetric analyzer (Rigaku) with  $\alpha\text{-Al}_2\text{O}_3$  as a reference under a dry  $\text{N}_2$  flow ( $100 \text{ mL min}^{-1}$ ) in the temperature range of 303–1273 K. Powder XRD patterns were measured with a New advance D8 X-ray diffractometer (Bruker) by using  $\text{Cu K}\alpha$  radiation ( $\lambda = 1.54056 \text{ \AA}$ , 40 kV-40 mA) at  $1.8 \text{ deg min}^{-1}$ .  $\text{N}_2$  (77 K) adsorption isotherm was measured using a Belsorp-max volumetric adsorption apparatus (BEL Japan). Prior to the measurement, about 0.1 g of crystals were ground and treated in vacuo at 373 K. Solid state magic angle spinning (MAS) NMR spectra with cross polarization (contact time = 2 ms) was recorded with an AVANCE 400WB spectrometer (Bruker) with a resonance frequency of 100.6 MHz ( $^{13}\text{C}$ ). MAS rate was 10 kHz and adamantane ( $^{13}\text{C}$ : 28.8 and 38.3 ppm) was used as an external standard for the calibration of chemical shifts. Monte Carlo (MC) based simulations were carried out using the Sorption tool of Materials Studio package

(Accelrys Inc.) by the Metropolis MC method with universal forcefield.<sup>S3,S4</sup> Prior to the MC simulations, partial atomic charges of the components of the host structure (i.e., POM and Al(III)-salphen) were derived from DFT calculations as follows: Template structures of POM and Al(III)-salphen were cut out from the crystal structure, and geometrical optimization followed by Mulliken charge analysis<sup>S5</sup> were carried out using the Dmol<sup>3</sup> tool<sup>S6</sup> of Materials Studio package. GGA-PBE exchange-correlation function<sup>S7</sup> and double-numerical plus polarization (DNP) function were used as the basis sets for all atoms. Partial atomic charges of pinacol were also derived from the Dmol<sup>3</sup> tool.<sup>S6</sup> During the MC simulation of the location of pinacol in **I**, positions of all atoms of the hosts were fixed, pinacol were treated as rigid bodies, and only translational degrees of freedom were considered (otherwise the calculation did not converge).

(S1) S. Kashanian, M. B. Gholivand, F. Ahmadi, A. Taravati, A. H. Colagar, *Spectrochim. Acta Part A*, **2007**, *67*, 472-478.

(S2) J. C. Bailar Jr., H. S. Booth, M. Grennert, *Inorg. Synth.*, **1939**, *1*, 132-133.

(S3) N. Metropolis, A. W. Rosenbluth, M. N. Rosenbluth, A. H. Teller, E. Teller, *J. Chem. Phys.*, **1953**, *21*, 1087-1092.

(S4) A. K. Rappé, C. J. Casewit, K. S. Colwell, W. A. Goddard III, W. M. Skiff, *J. Am. Chem. Soc.*, **1992**, *114*, 10024-10035.

(S5) R. S. Mulliken, *J. Chem. Phys.*, **1955**, *23*, 1833-1840.

(S6) B. Delley, *J. Chem. Phys.*, **2000**, *113*, 7756-7764.

(S7) J. P. Perdew, K. Burke, M. Ernzerhof, *Phys. Rev. Lett.*, **1996**, *77*, 3865-3868.

**Table S1.** Crystallographic data of **I**

|                                                             |                                                                                                                                                                                                                                                            |
|-------------------------------------------------------------|------------------------------------------------------------------------------------------------------------------------------------------------------------------------------------------------------------------------------------------------------------|
| Formula                                                     | [Al(salphen)(H <sub>2</sub> O) <sub>2</sub> ] <sub>3</sub> [ $\alpha$ -PW <sub>12</sub> O <sub>40</sub> ] $\cdot$ 7CH <sub>3</sub> COCH <sub>3</sub><br>(C <sub>72</sub> H <sub>78</sub> N <sub>6</sub> Al <sub>3</sub> O <sub>56</sub> PW <sub>12</sub> ) |
| Crystal system                                              | Monoclinic                                                                                                                                                                                                                                                 |
| Space group                                                 | <i>P2/c</i>                                                                                                                                                                                                                                                |
| Unit cell dimensions                                        | <i>a</i> = 32.127(7), <i>b</i> = 15.117(4), <i>c</i> = 26.528(7),<br>$\beta$ = 92.984(4)                                                                                                                                                                   |
| Volume                                                      | 12866(5)                                                                                                                                                                                                                                                   |
| <i>Z</i>                                                    | 4                                                                                                                                                                                                                                                          |
| <i>D</i> <sub>calc</sub> (g cm <sup>-3</sup> )              | 2.279                                                                                                                                                                                                                                                      |
| <i>F</i> (000)                                              | 8152                                                                                                                                                                                                                                                       |
| <i>h, k, l</i> range                                        | -32/38, -15/18, -31/31                                                                                                                                                                                                                                     |
| $\mu$ (Mo K $\alpha$ ) (mm <sup>-1</sup> )                  | 10.810                                                                                                                                                                                                                                                     |
| <i>R</i> <sub>1</sub> ( <i>I</i> > 2 $\sigma$ ( <i>I</i> )) | 0.0782                                                                                                                                                                                                                                                     |
| <i>wR</i> <sub>2</sub> (all data)                           | 0.2066                                                                                                                                                                                                                                                     |
| GOF on <i>F</i> <sup>2</sup>                                | 1.094                                                                                                                                                                                                                                                      |

**Table S2.** Selected bond distances (Å), angles (°), and atomic numbering schemes

| <b>Compound I</b> |         |          |         |               |          |
|-------------------|---------|----------|---------|---------------|----------|
| W1-O5             | 1.7     | W10-O40  | 1.89(3) | Al3-O303      | 1.78(1)  |
| W1-O6             | 1.86    | W10-O41  | 1.68(2) | Al3-N300      | 1.98(2)  |
| W1-O7             | 1.93    | W10-O42  | 1.89(2) | Al3-N301      | 1.99(2)  |
| W2-O28            | 1.85(2) | W10-O45  | 1.88(2) | O100-Al1-O101 | 175.1(7) |
| W2-O30            | 1.93(2) | W11-O29  | 1.86(2) | O100-Al1-O102 | 90.4(7)  |
| W2-O31            | 1.88(2) | W11-O30  | 1.87(2) | O100-Al1-O103 | 93.3(7)  |
| W2-O39            | 1.69(2) | W11-O31  | 1.93(2) | O100-Al1-N100 | 85.9(7)  |
| W2-O42            | 1.93(2) | W11-O37  | 1.67(2) | O100-Al1-N101 | 90.7(7)  |
| W3-O28            | 1.90(2) | W11-O40  | 1.89(2) | O101-Al1-O102 | 93.8(7)  |
| W3-O29            | 1.90(2) | W12-O7   | 1.87(2) | O101-Al1-O103 | 89.0(6)  |
| W3-O32            | 1.91(2) | W12-O10  | 1.87(2) | O101-Al1-N100 | 89.7(7)  |
| W3-O33            | 1.89(2) | W12-O12  | 1.67(2) | O101-Al1-N101 | 86.4(7)  |
| W3-O36            | 1.69(2) | W12-O14  | 1.84(2) | O102-Al1-O103 | 93.6(7)  |
| W4-O9             | 1.92(2) | W12-O22  | 1.89(2) | O102-Al1-N101 | 94.0(7)  |
| W4-O11            | 1.67(2) | W13-O6   | 1.94(2) | O103-Al1-N100 | 92.0(7)  |
| W4-O13            | 1.89(2) | W13-O8   | 1.67(2) | N100-Al1-N101 | 80.7(7)  |
| W4-O19            | 1.88(2) | W13-O9   | 1.85(2) | O200-Al2-O201 | 174.7(7) |
| W4-O20            | 1.90(2) | W13-O10  | 1.91(2) | O200-Al2-O202 | 93.4(6)  |
| W5-O32            | 1.87(2) | W13-O21  | 1.89(2) | O200-Al2-O203 | 88.4(6)  |
| W5-O34            | 1.89(2) | P1-O1    | 1.48    | O200-Al2-N200 | 88.4(7)  |
| W5-O35            | 1.68(2) | P1-O2    | 1.53    | O200-Al2-N201 | 87.9(7)  |
| W5-O43            | 1.92(3) | P1-O3    | 1.54    | O201-Al2-O202 | 91.6(6)  |
| W5-O45            | 1.89(2) | P1-O4    | 1.54    | O201-Al2-O203 | 93.5(6)  |
| W6-O13            | 1.89(2) | P2-O24   | 1.54    | O201-Al2-N200 | 86.5(7)  |
| W6-O14            | 1.92(2) | P2-O25   | 1.48    | O201-Al2-N201 | 89.8(7)  |
| W6-O15            | 1.68(2) | P2-O26   | 1.51    | O202-Al2-O203 | 91.4(6)  |
| W6-O17            | 1.90(2) | P2-O27   | 1.51    | O202-Al2-N201 | 94.1(7)  |
| W6-O18            | 1.91(3) | Al1-O100 | 1.95(2) | O203-Al2-N200 | 93.5(7)  |
| W7-O16            | 1.68    | Al1-O101 | 1.93(2) | N200-Al2-N201 | 81.1(7)  |
| W7-O17            | 1.9     | Al1-O102 | 1.81(2) | O300-Al3-O301 | 175.5(7) |
| W7-O19            | 1.93    | Al1-O103 | 1.83(1) | O300-Al3-O302 | 91.4(7)  |
| W8-O18            | 1.89(3) | Al1-N100 | 2.01(2) | O300-Al3-O303 | 92.1(7)  |
| W8-O20            | 1.87(2) | Al1-N101 | 2.00(2) | O300-Al3-N300 | 90.2(7)  |
| W8-O21            | 1.93(2) | Al2-O200 | 1.93(1) | O300-Al3-N301 | 89.9(7)  |
| W8-O22            | 1.92(2) | Al2-O201 | 1.98(2) | O301-Al3-O302 | 90.9(7)  |
| W8-O23            | 1.66(2) | Al2-O202 | 1.83(1) | O301-Al3-O303 | 91.7(6)  |
| W9-O33            | 1.89(2) | Al2-O203 | 1.81(1) | O301-Al3-N300 | 85.8(7)  |
| W9-O34            | 1.88(2) | Al2-N200 | 2.00(2) | O301-Al3-N301 | 87.4(7)  |
| W9-O41            | 1.92(2) | Al2-N201 | 1.97(2) | O302-Al3-O303 | 92.3(7)  |
| W9-O43            | 1.89(3) | Al3-O300 | 1.94(1) |               |          |
| W9-O44            | 1.68(2) | Al3-O301 | 1.97(2) |               |          |
| W10-O38           | 1.92(2) | Al3-O302 | 1.84(2) |               |          |

Symmetry Codes: (1) x, y, z, (2) -x, y, 1/2-z, (3) -x, -y, -z, (4) x, -y, 1/2+z



**Table S3.** Possible hydrogen bonds and their distances (Å)

| <b>Compound 1</b>                                   |       |
|-----------------------------------------------------|-------|
| O103(Al-salphen)-O200(Al-salphen,H <sub>2</sub> O)  | 2.601 |
| O101(Al-salphen, H <sub>2</sub> O)-O203(Al-salphen) | 2.632 |
| O201(Al-salphen, H <sub>2</sub> O)-O302(Al-salphen) | 2.629 |
| O202(Al-salphen)-O300(Al-salphen, H <sub>2</sub> O) | 2.676 |
| O301(Al-salphen, H <sub>2</sub> O)-O400(acetone, O) | 2.676 |
| O201(Al-salphen, H <sub>2</sub> O)-O401(acetone, O) | 2.763 |
| O300(Al-salphen, H <sub>2</sub> O)-O402(acetone, O) | 2.604 |
| O101(Al-Salphen, H <sub>2</sub> O)-O403(acetone, O) | 2.646 |
| O100(Al-Salphen, H <sub>2</sub> O)-O404(acetone, O) | 2.590 |
| O100(Al-Salphen, H <sub>2</sub> O)-O405(acetone, O) | 2.676 |
| O301(Al-Salphen, H <sub>2</sub> O)-O406(acetone, O) | 2.780 |

**Table S4.** Pinacol to pinacolone rearrangement over various solid catalysts and conditions

| Catalyst                                                                                                                                                               | Temp<br>[K] | Solvent            | Time<br>[h] | Conv.<br>[%] | Selec. <sup>a</sup><br>[%] | Reference |
|------------------------------------------------------------------------------------------------------------------------------------------------------------------------|-------------|--------------------|-------------|--------------|----------------------------|-----------|
| H-ZSM-5                                                                                                                                                                | 393         | -                  | 4           | 80           | 90                         | 1         |
| Ca-HY                                                                                                                                                                  | 393         | -                  | 4           | 70           | 88                         | 1         |
| La-HY                                                                                                                                                                  | 393         | -                  | 4           | 68           | 82                         | 1         |
| Nafion-H                                                                                                                                                               | 448         | -                  | 0.6         | 92           | 75                         | 2         |
| Fe-AlPO                                                                                                                                                                | 383         | Toluene            | 3           | 69           | 81                         | 3         |
| Ni-AlPO                                                                                                                                                                | 383         | Toluene            | 3           | 50           | 80                         | 3         |
| Cu-AlPO                                                                                                                                                                | 383         | Toluene            | 3           | 54           | 80                         | 3         |
| Fe-ZSM-5                                                                                                                                                               | 383         | Toluene            | 6           | 0            | -                          | 4         |
| Fe-MCM-41                                                                                                                                                              | 383         | Toluene            | 6           | 33           | 64                         | 4         |
| MCM-41                                                                                                                                                                 | 383         | Toluene            | 6           | 13           | 14                         | 4         |
| Phosphonate-polysilsesquioxane                                                                                                                                         | 413         | -                  | 12          | -            | 80 <sup>d</sup>            | 5         |
| Fe-Na-montmorillonite <sup>b</sup>                                                                                                                                     | 398         | -                  | 1           | 34           | 100                        | 6         |
| Al <sub>13</sub> -montmorillonite <sup>b</sup>                                                                                                                         | 398         | -                  | 1           | 100          | 100                        | 6         |
| Fe-Al <sub>13</sub> -montmorillonite <sup>b</sup>                                                                                                                      | 398         | -                  | 1           | 100          | 100                        | 6         |
| None                                                                                                                                                                   | 573–723     | scH <sub>2</sub> O | -           | 100          | 100                        | 8         |
| H <sub>4</sub> SiMo <sub>12</sub> O <sub>40</sub>                                                                                                                      | 423         | -                  | 1           | 100          | 44 <sup>c</sup>            | 9         |
| H <sub>3</sub> PMo <sub>12</sub> O <sub>40</sub>                                                                                                                       | 423         | -                  | 1           | 100          | 43 <sup>c</sup>            | 9         |
| H <sub>4</sub> SiW <sub>12</sub> O <sub>40</sub>                                                                                                                       | 423         | -                  | 1           | 100          | 71                         | 9         |
| H <sub>3</sub> PW <sub>12</sub> O <sub>40</sub>                                                                                                                        | 423         | -                  | 1           | 100          | 78                         | 9         |
| [Cr <sub>3</sub> O(OOCPh) <sub>6</sub> (H <sub>2</sub> O)] <sub>4</sub> [SiW <sub>12</sub> O <sub>40</sub> ]                                                           | 373         | Toluene            | 12          | 100          | 79                         | 10        |
| [Fe <sub>3</sub> O(OOCPh) <sub>6</sub> (H <sub>2</sub> O)] <sub>4</sub> [SiW <sub>12</sub> O <sub>40</sub> ]                                                           | 373         | Toluene            | 6           | 100          | 80                         | 10        |
| [ε-Al <sub>13</sub> O <sub>4</sub> (OH) <sub>25</sub> (H <sub>2</sub> O) <sub>11</sub> ][α-CoW <sub>12</sub> O <sub>40</sub> ] · 34H <sub>2</sub> O (needle polymorph) | 373         | Toluene            | 40          | 31           | 58                         | 11        |
| [ε-Al <sub>13</sub> O <sub>4</sub> (OH) <sub>25</sub> (H <sub>2</sub> O) <sub>11</sub> ][α-CoW <sub>12</sub> O <sub>40</sub> ] · 42H <sub>2</sub> O (plate polymorph)  | 373         | Toluene            | 40          | 76           | 78                         | 11        |
| Al <sub>2</sub> O <sub>3</sub>                                                                                                                                         | 473         | -                  | 1           | 62           | 44                         | 12        |
| Aluminum phosphate                                                                                                                                                     | 473         | -                  | 1           | 62           | 46                         | 12        |
| SiO <sub>2</sub>                                                                                                                                                       | 473         | -                  | 1           | 34           | 42                         | 12        |
| ZrO <sub>2</sub>                                                                                                                                                       | 473         | -                  | 1           | 31           | 44                         | 12        |

a: by-product is 2,3-dimethyl-1,3-butadiene. b: catalyst : reactant = 5 : 1. c: by-product is acetone.

(1) *J. Mol. Catal.*, **1994**, *87*, 39. (2) *Tetrahedron*, **1994**, *50*, 8195. (3) *Microporous Mesoporous Mater.*, **1998**, *21*, 505. (4) *J. Mol. Catal. A: Chemical*, **2002**, *181*, 189. (5) *Chem. Commun.*, **2001**, 67. (6) *J. Chem. Soc. Faraday Trans.*, **1997**, *93*, 1591. (7) *J. Am. Chem. Soc.*, **2002**, *124*, 5962. (8) *J. Am. Chem. Soc.*, **2000**, *122*, 1908. (9) *J. Mol. Catal. A: Chemical*, **1996**, *107*, 305. (10) *Inorg. Chem.*, **2012**, *51*, 775. (11) *Cryst. Growth Des.*, **2016**, *16*, 4968. (12) *Indian J. Chem. Technol.*, **2005**, *12*, 447.

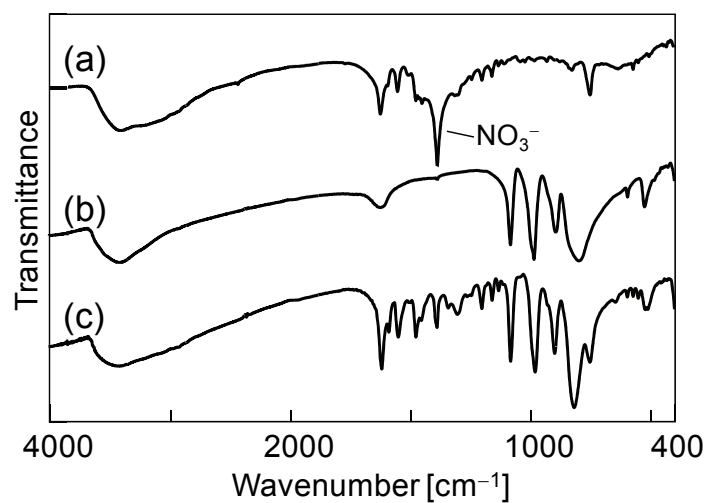

**Figure S1.** IR spectra of (a)  $[\text{Al}(\text{salphen})(\text{H}_2\text{O})_2](\text{NO}_3)$ , (b)  $\text{Na}_3[\alpha\text{-PW}_{12}\text{O}_{40}]$ , and (c) **I**. Note that the signal assigned to nitrate in (a) is absent in (c), showing that  $\text{NO}_3^-$  has been replaced by  $[\alpha\text{-PW}_{12}\text{O}_{40}]^{3-}$ .



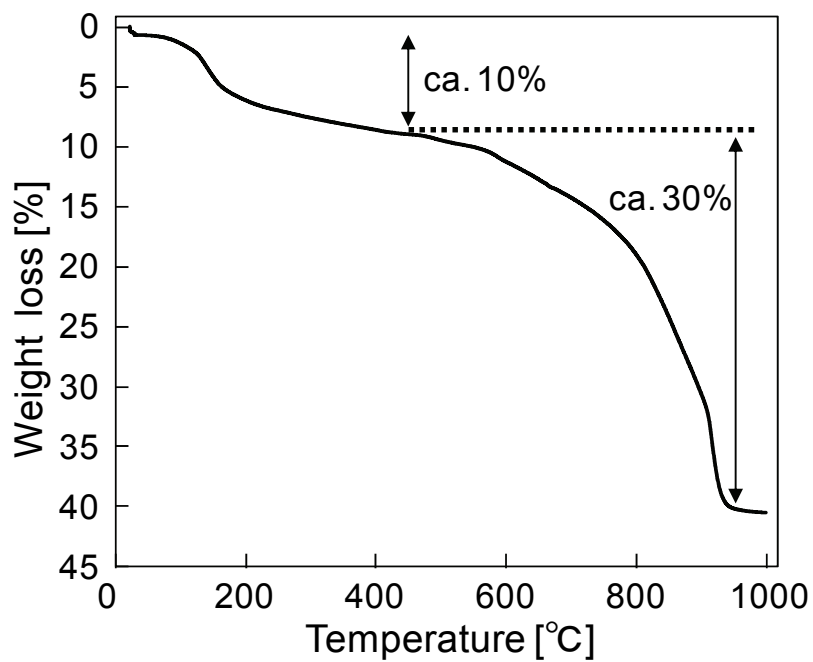

**Figure S2.** Thermogravimetry of **I** under a dry N<sub>2</sub> flow (100 mL min<sup>-1</sup>). The weight loss (ca. 10%) between rt and 450 °C (723 K) can be assigned to the desorption of solvent molecules (four *p*-xylene molecules). The weight loss (ca. 30%) between 450–1000 °C (1273 K) can be assigned to the removal of salphen ligands.

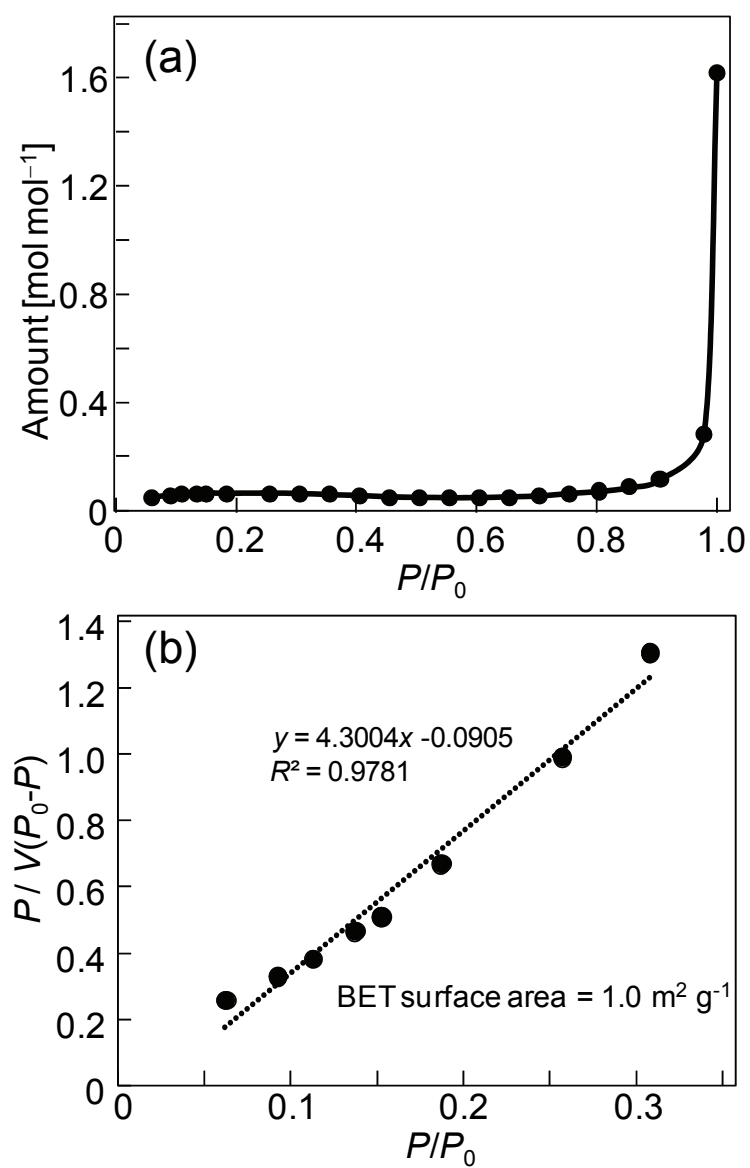

**Figure S3.** (a) N<sub>2</sub> adsorption isotherm (77 K) and (b) BET plot of **I** (pretreatment: evacuation at 373 K).

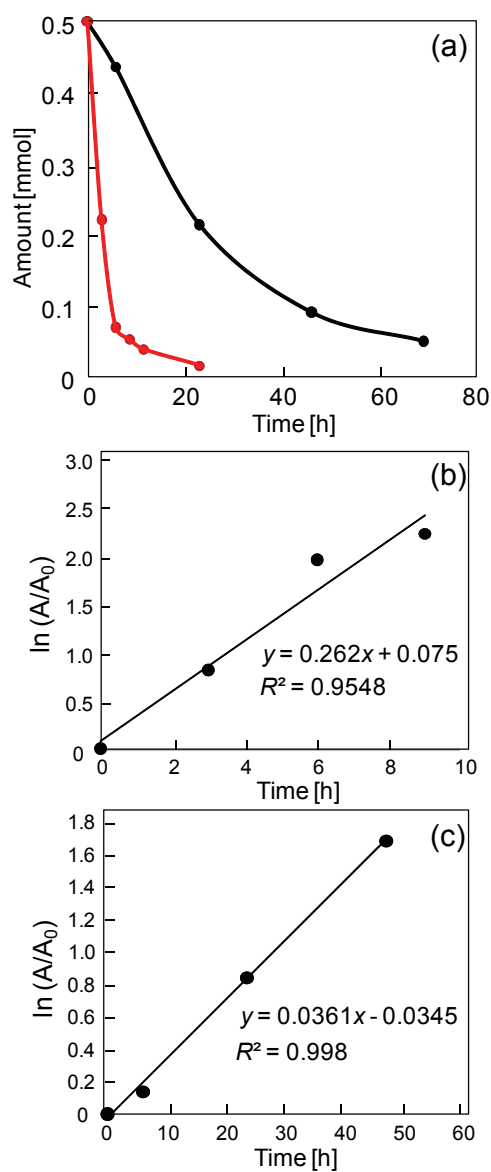

**Figure S4.** (a) Time courses of changes in amounts of pinacol with **I** (porous crystalline compound, red) or **I** after evacuation at 373 K (non-porous amorphous compound, black) as catalysts. Reaction rates of (b) **I** (porous crystalline compound) and (c) **I** after evacuation at 373 K (non-porous amorphous compound). It was assumed that the reaction is first-order in pinacol.

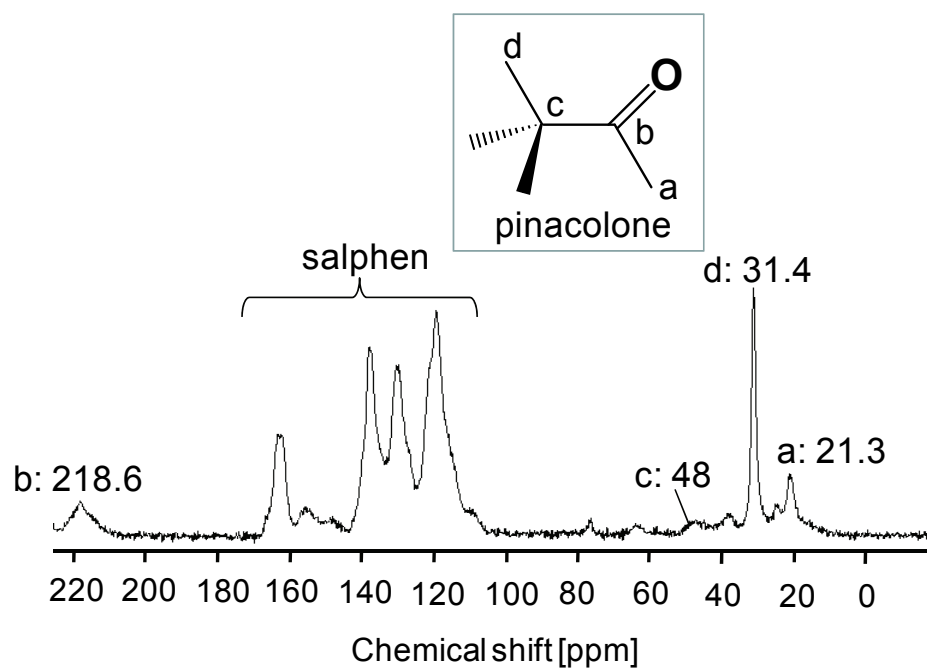

**Figure S5.**  $^{13}\text{C}$ -CPMASNMR spectrum of **I** after the reaction. Pinacolone is the main product of this reaction.  $^{13}\text{C}$ -NMR spectrum of pinacolone in  $\text{CDCl}_3$  shows peaks at 213.8, 44.3, 26.4, and 24.6 ppm for b, c, d, and a, respectively.<sup>S8</sup>

(S8) Spectral database for organic compound (SDBS) at National institute of Advanced Industrial Science and Technology (AIST).

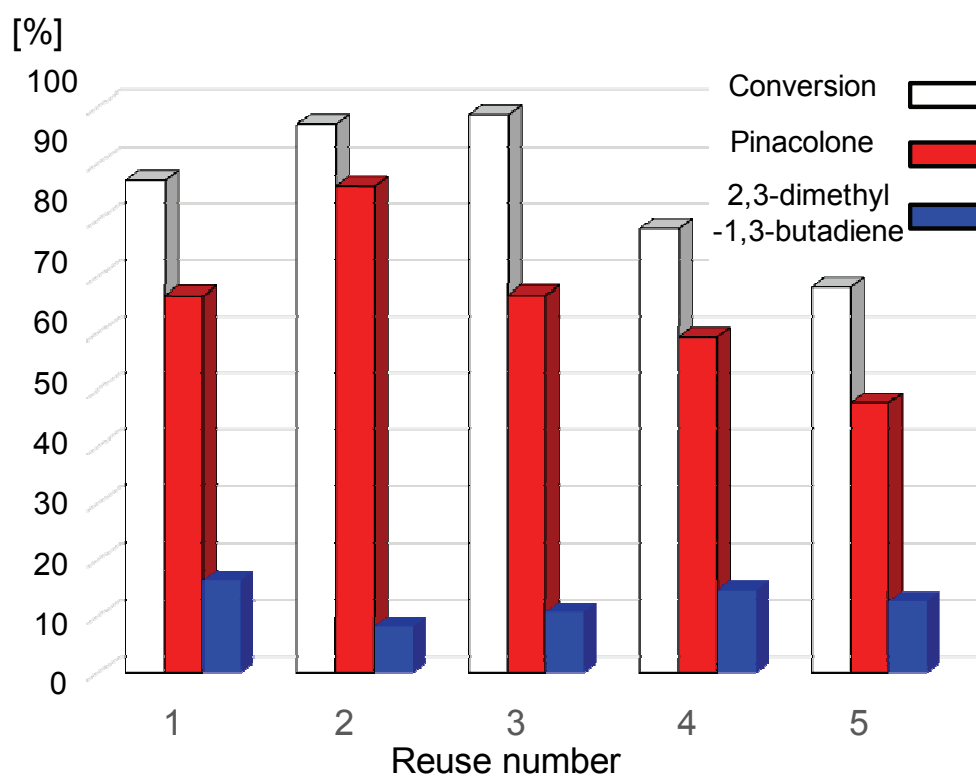

**Figure S6.** Catalytic activities of **I** after successive reuse experiments. Compound **I** was washed with *p*-xylene before the next reuse experiment. The increase in the catalytic activities for the second and third runs is probably due to the products which remained in the pore after the first and second runs, respectively. On the other hand, the decrease for the fourth and fifth runs is probably due to the difficulty in collecting the solid catalyst, which sticks to the glass reactor and magnetic stirrer, and/or slight changes in the crystal structure of **I**.

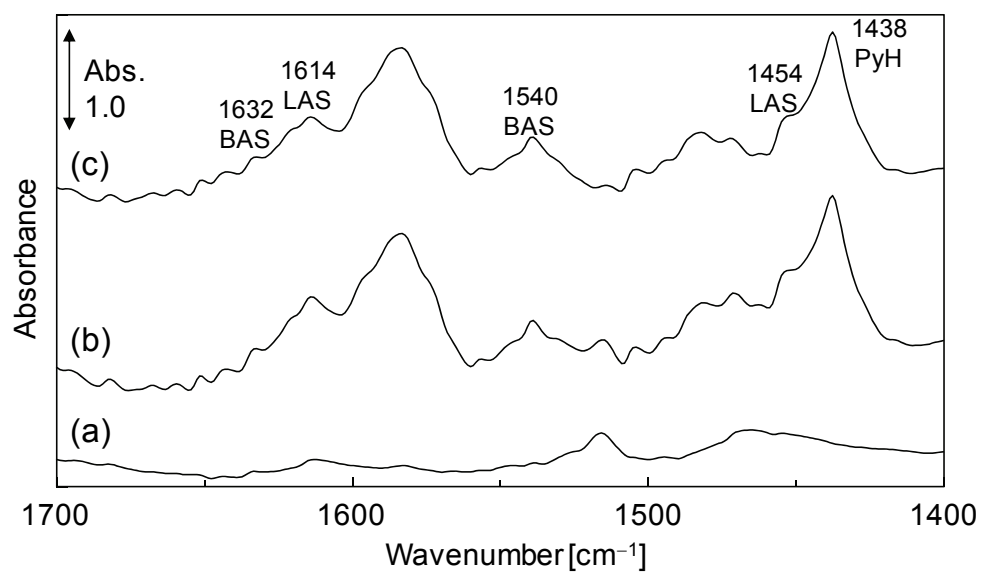

**Figure S7.** IR spectra of (a) **I**, (b) **I** treated with pyridine as a basic probe molecule, and (c) difference spectrum (b – a). BAS: pyridine adsorbed on Lewis acid site; LAS: pyridine adsorbed on Lewis acid site; PyH: hydrogen-bonded pyridine.
